# Supplementary material
Source: MDPI journal article supplement (https://www.mdpi.com/2076-3417/12/6/2883)
Supplement: s1 [file s1]

**Table S1.** Antimicrobial susceptibility of strain OS4<sup>T</sup> and the related *Jannaschia* species.

| <b>Antibiotics</b> | <b>OS4<sup>T</sup></b> | <b>14858<sup>T</sup></b> | <b>GSW-M26<sup>T</sup></b> |
|--------------------|------------------------|--------------------------|----------------------------|
| Clarithromycin     | S                      | S                        | S                          |
| Ceftriaxone        | S                      | S                        | S                          |
| Penicillin         | S                      | R                        | S                          |
| Erythromycin       | S                      | S                        | S                          |
| Cefotaxime         | S                      | S                        | S                          |
| Rifampicin         | S                      | S                        | S                          |
| Norfloxacin        | S                      | S                        | S                          |
| Polymyxin B        | S                      | S                        | S                          |
| Vancomycin         | S                      | S                        | S                          |
| Lincomycin         | S                      | S                        | S                          |
| Kanamycin          | R                      | R                        | S                          |
| Carbenicillin      | R                      | R                        | R                          |
| Neomycin           | R                      | R                        | S                          |
| Chloramphenicol    | R                      | R                        | S                          |
| Gentamycin         | R                      | R                        | R                          |
| Ofloxacin          | R                      | R                        | R                          |
| Oxytetracycline    | R                      | R                        | R                          |
| Streptomycin       | R                      | I                        | I                          |
| Ampicillin         | R                      | R                        | R                          |
| Tobramycin         | R                      | R                        | R                          |
| Tetracycline       | R                      | R                        | R                          |
| Clindamycin        | R                      | R                        | R                          |

R: resistant to certain antibiotics; S: susceptible to certain antibiotics.

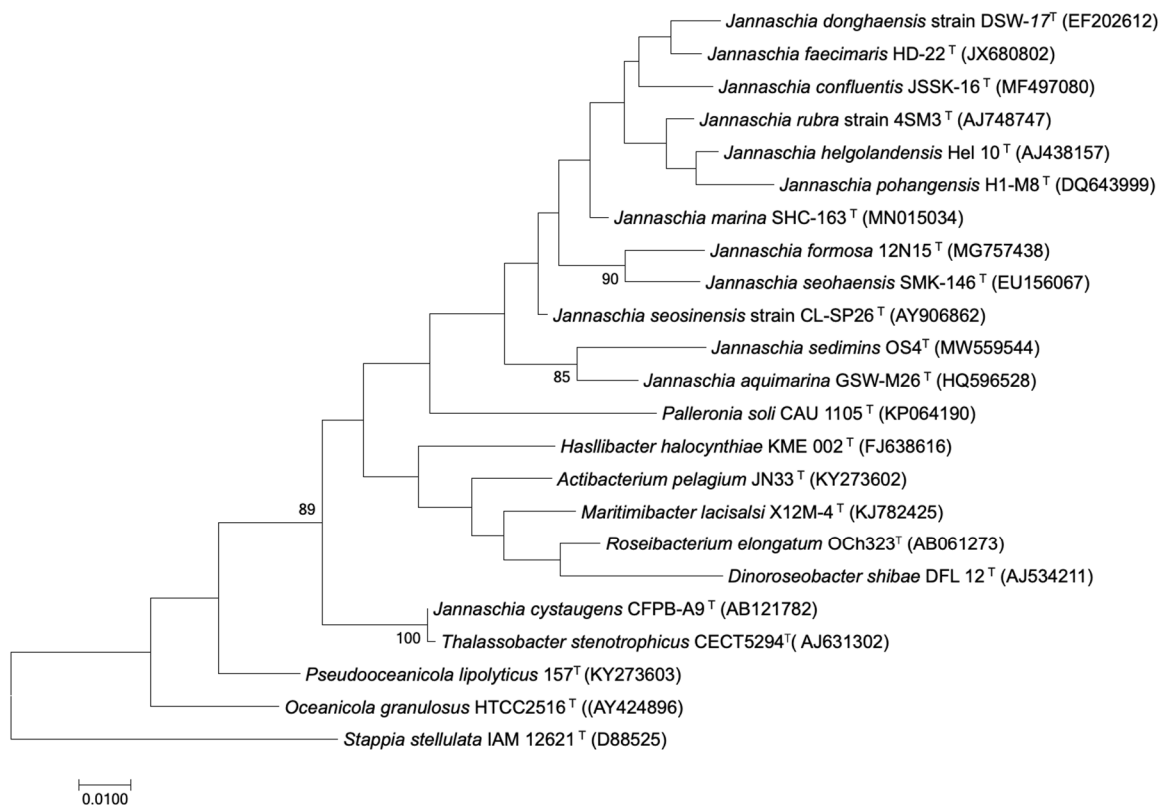

**Figure S1.** Phylogenetic relationship of strain OS4<sup>T</sup> and other related species. Maximal likelihood phylogenetic tree based on 16S rRNA gene sequences, showing the relationships of strain OS4<sup>T</sup> and related species. B *Stappia stellulata* IAM12621<sup>T</sup> (GenBank accession number, D88525) was used as an outgroup. Bar, 0.01 substitutions per nucleotide position.

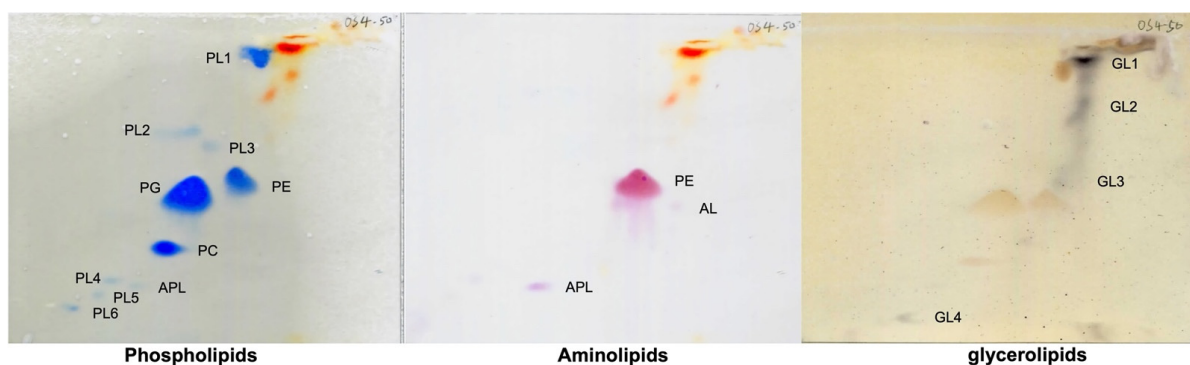

**Figure S2.** The polar lipid composition of OS4<sup>T</sup>.
