# Supplementary material
Source: MDPI journal article supplement (https://www.mdpi.com/2076-3417/12/6/2883)
Supplement: s1 [file s1 › Supplementary Table S2.xlsx]

## Sheet: Sheet1
ORF_ID	Contig	Start	Stop	Orientation	Best_Hit_ARO	Drug Class
Scaffold1_1_29 # 26870 # 27352 # 1 # ID=1_29;partial=00;start_type=ATG;rbs_motif=None;rbs_spacer=None;gc_cont=0.741	Scaffold1_1_29	26870	27352	+	AAC(3)-Ia	aminoglycoside antibiotic
Scaffold1_1_638 # 614993 # 615559 # -1 # ID=1_638;partial=00;start_type=GTG;rbs_motif=GGAG/GAGG;rbs_spacer=5-10bp;gc_cont=0.785	Scaffold1_1_638	614993	615559	-	AAC(6')-Iak	aminoglycoside antibiotic
Scaffold2_1_217 # 222910 # 223239 # 1 # ID=4_217;partial=00;start_type=ATG;rbs_motif=GGAG/GAGG;rbs_spacer=5-10bp;gc_cont=0.679	Scaffold2_1_217	222910	223239	+	abeS	macrolide antibiotic; aminocoumarin antibiotic
Scaffold2_1_126 # 127123 # 128019 # 1 # ID=4_126;partial=00;start_type=ATG;rbs_motif=AGGAG;rbs_spacer=5-10bp;gc_cont=0.679	Scaffold2_1_126	127123	128019	+	adeL	fluoroquinolone antibiotic; tetracycline antibiotic
Scaffold2_1_65 # 61772 # 62155 # -1 # ID=4_65;partial=00;start_type=ATG;rbs_motif=AGGAG;rbs_spacer=5-10bp;gc_cont=0.727	Scaffold2_1_65	61772	62155	-	arlR	fluoroquinolone antibiotic; acridine dye; disinfecting agents and intercalating dyes
Scaffold2_1_809 # 815497 # 816390 # -1 # ID=4_809;partial=00;start_type=ATG;rbs_motif=GGAG/GAGG;rbs_spacer=5-10bp;gc_cont=0.785	Scaffold2_1_809	815497	816390	-	arnA	peptide antibiotic
Scaffold1_2_150 # 161936 # 162736 # -1 # ID=2_150;partial=00;start_type=ATG;rbs_motif=GGAG/GAGG;rbs_spacer=5-10bp;gc_cont=0.718	Scaffold1_2_150	161936	162736	-	bacA	peptide antibiotic
Scaffold2_1_105 # 104689 # 105708 # -1 # ID=4_105;partial=00;start_type=GTG;rbs_motif=None;rbs_spacer=None;gc_cont=0.756	Scaffold2_1_105	104689	105708	-	baeS	aminoglycoside antibiotic; aminocoumarin antibiotic
Scaffold3_1_188 # 186762 # 187970 # -1 # ID=5_188;partial=00;start_type=GTG;rbs_motif=None;rbs_spacer=None;gc_cont=0.733	Scaffold3_1_188	186762	187970	-	bcr-1	bicyclomycin
Scaffold1_2_127 # 137086 # 137769 # -1 # ID=2_127;partial=00;start_type=GTG;rbs_motif=GGA/GAG/AGG;rbs_spacer=5-10bp;gc_cont=0.702	Scaffold1_2_127	137086	137769	-	bcrA	peptide antibiotic
Scaffold1_3_669 # 650842 # 651750 # 1 # ID=3_669;partial=00;start_type=GTG;rbs_motif=GGAGG;rbs_spacer=5-10bp;gc_cont=0.723	Scaffold1_3_669	650842	651750	+	BJP-1	carbapenem
Scaffold3_1_237 # 229942 # 231102 # -1 # ID=5_237;partial=00;start_type=ATG;rbs_motif=None;rbs_spacer=None;gc_cont=0.748	Scaffold3_1_237	229942	231102	-	BUT-1	cephalosporin
Scaffold2_1_231 # 238163 # 238957 # -1 # ID=4_231;partial=00;start_type=ATG;rbs_motif=GGA/GAG/AGG;rbs_spacer=5-10bp;gc_cont=0.723	Scaffold2_1_231	238163	238957	-	catB3	phenicol antibiotic
Scaffold2_1_852 # 848525 # 849322 # -1 # ID=4_852;partial=00;start_type=GTG;rbs_motif=None;rbs_spacer=None;gc_cont=0.731	Scaffold2_1_852	848525	849322	-	CAU-1	carbapenem; penam
Scaffold1_2_149 # 160584 # 161945 # 1 # ID=2_149;partial=00;start_type=ATG;rbs_motif=None;rbs_spacer=None;gc_cont=0.731	Scaffold1_2_149	160584	161945	+	cdeA	fluoroquinolone antibiotic; acridine dye; disinfecting agents and intercalating dyes
Scaffold1_3_241 # 229598 # 230773 # 1 # ID=3_241;partial=00;start_type=ATG;rbs_motif=None;rbs_spacer=None;gc_cont=0.695	Scaffold1_3_241	229598	230773	+	clbB	lincosamide antibiotic; streptogramin antibiotic; oxazolidinone antibiotic; phenicol antibiotic; pleuromutilin antibiotic
Scaffold2_1_25 # 21306 # 24071 # -1 # ID=4_25;partial=00;start_type=ATG;rbs_motif=AGGA;rbs_spacer=5-10bp;gc_cont=0.697	Scaffold2_1_25	21306	24071	-	Clostridioides difficile gyrA conferring resistance to fluoroquinolones	fluoroquinolone antibiotic
Scaffold2_1_459 # 464565 # 466205 # -1 # ID=4_459;partial=00;start_type=ATG;rbs_motif=None;rbs_spacer=None;gc_cont=0.775	Scaffold2_1_459	464565	466205	-	cpxA	aminoglycoside antibiotic; aminocoumarin antibiotic
Scaffold3_1_121 # 116750 # 117655 # 1 # ID=5_121;partial=00;start_type=GTG;rbs_motif=GGA/GAG/AGG;rbs_spacer=5-10bp;gc_cont=0.722	Scaffold3_1_121	116750	117655	+	D-Ala-D-Ala ligase	glycopeptide antibiotic
Scaffold1_1_329 # 322473 # 323888 # 1 # ID=1_329;partial=00;start_type=ATG;rbs_motif=AGxAGG/AGGxGG;rbs_spacer=5-10bp;gc_cont=0.746	Scaffold1_1_329	322473	323888	+	efpA	rifamycin antibiotic; isoniazid
Scaffold3_1_137 # 137211 # 138044 # -1 # ID=5_137;partial=00;start_type=ATG;rbs_motif=GGA/GAG/AGG;rbs_spacer=5-10bp;gc_cont=0.763	Scaffold3_1_137	137211	138044	-	ErmE	macrolide antibiotic; lincosamide antibiotic; streptogramin antibiotic
Scaffold2_1_252 # 261608 # 262222 # 1 # ID=4_252;partial=00;start_type=TTG;rbs_motif=None;rbs_spacer=None;gc_cont=0.727	Scaffold2_1_252	261608	262222	+	Escherichia coli acrR with mutation conferring multidrug antibiotic resistance	fluoroquinolone antibiotic; cephalosporin; glycylcycline; penam; tetracycline antibiotic; rifamycin antibiotic; phenicol antibiotic; triclosan
Scaffold2_1_151 # 152038 # 152679 # 1 # ID=4_151;partial=00;start_type=TTG;rbs_motif=GGAGG;rbs_spacer=5-10bp;gc_cont=0.706	Scaffold2_1_151	152038	152679	+	evgA	macrolide antibiotic; fluoroquinolone antibiotic; penam; tetracycline antibiotic
Scaffold2_1_223 # 228973 # 231324 # -1 # ID=4_223;partial=00;start_type=ATG;rbs_motif=GGA/GAG/AGG;rbs_spacer=5-10bp;gc_cont=0.754	Scaffold2_1_223	228973	231324	-	evgS	macrolide antibiotic; fluoroquinolone antibiotic; penam; tetracycline antibiotic
Scaffold2_1_819 # 822491 # 822904 # 1 # ID=4_819;partial=00;start_type=ATG;rbs_motif=GGAGG;rbs_spacer=5-10bp;gc_cont=0.732	Scaffold2_1_819	822491	822904	+	FosA	fosfomycin
Scaffold3_1_14 # 11460 # 11873 # -1 # ID=5_14;partial=00;start_type=ATG;rbs_motif=GGA/GAG/AGG;rbs_spacer=5-10bp;gc_cont=0.698	Scaffold3_1_14	11460	11873	-	FosK	fosfomycin
Scaffold1_3_762 # 759227 # 759697 # -1 # ID=3_762;partial=00;start_type=ATG;rbs_motif=GGAGG;rbs_spacer=5-10bp;gc_cont=0.720	Scaffold1_3_762	759227	759697	-	golS	monobactam; carbapenem; cephalosporin; cephamycin; penam; phenicol antibiotic; penem
Scaffold2_1_660 # 684221 # 685939 # 1 # ID=4_660;partial=00;start_type=ATG;rbs_motif=AGxAGG/AGGxGG;rbs_spacer=3-4bp;gc_cont=0.770	Scaffold2_1_660	684221	685939	+	iri	rifamycin antibiotic
Scaffold1_1_603 # 582417 # 583712 # -1 # ID=1_603;partial=00;start_type=ATG;rbs_motif=GGAG/GAGG;rbs_spacer=5-10bp;gc_cont=0.754	Scaffold1_1_603	582417	583712	-	kdpE	aminoglycoside antibiotic
Scaffold1_3_459 # 452432 # 453490 # -1 # ID=3_459;partial=00;start_type=GTG;rbs_motif=GGAG/GAGG;rbs_spacer=5-10bp;gc_cont=0.754	Scaffold1_3_459	452432	453490	-	Laribacter hongkongensis ampC beta-lactamase	cephalosporin; penam
Scaffold1_3_586 # 569146 # 570816 # 1 # ID=3_586;partial=00;start_type=ATG;rbs_motif=AGGA;rbs_spacer=5-10bp;gc_cont=0.698	Scaffold1_3_586	569146	570816	+	LMB-1	carbapenem; cephalosporin; penam
Scaffold3_1_548 # 514261 # 514893 # -1 # ID=5_548;partial=00;start_type=ATG;rbs_motif=GGA/GAG/AGG;rbs_spacer=5-10bp;gc_cont=0.768	Scaffold3_1_548	514261	514893	-	lmrC	macrolide antibiotic; lincosamide antibiotic; streptogramin antibiotic; tetracycline antibiotic; oxazolidinone antibiotic; phenicol antibiotic; pleuromutilin antibiotic
Scaffold3_1_142 # 141220 # 143364 # -1 # ID=5_142;partial=00;start_type=ATG;rbs_motif=GGAGG;rbs_spacer=3-4bp;gc_cont=0.740	Scaffold3_1_142	141220	143364	-	LptD	carbapenem; peptide antibiotic; aminocoumarin antibiotic; rifamycin antibiotic
Scaffold1_1_201 # 199286 # 200893 # -1 # ID=1_201;partial=00;start_type=TTG;rbs_motif=GGAG/GAGG;rbs_spacer=5-10bp;gc_cont=0.701	Scaffold1_1_201	199286	200893	-	macB	macrolide antibiotic
Scaffold4_1_18 # 38801 # 39643 # -1 # ID=6_18;partial=00;start_type=ATG;rbs_motif=None;rbs_spacer=None;gc_cont=0.763	Scaffold4_1_18	38801	39643	-	marA	fluoroquinolone antibiotic; monobactam; carbapenem; cephalosporin; glycylcycline; cephamycin; penam; tetracycline antibiotic; rifamycin antibiotic; phenicol antibiotic; triclosan; penem
Scaffold1_1_85 # 77639 # 79582 # -1 # ID=1_85;partial=00;start_type=ATG;rbs_motif=GGAGG;rbs_spacer=5-10bp;gc_cont=0.726	Scaffold1_1_85	77639	79582	-	mecD	penam
Scaffold1_3_756 # 749704 # 752808 # -1 # ID=3_756;partial=00;start_type=ATG;rbs_motif=GGxGG;rbs_spacer=3-4bp;gc_cont=0.685	Scaffold1_3_756	749704	752808	-	MexK	macrolide antibiotic; tetracycline antibiotic; triclosan
Scaffold1_1_654 # 630366 # 631016 # -1 # ID=1_654;partial=00;start_type=ATG;rbs_motif=GGAGG;rbs_spacer=3-4bp;gc_cont=0.690	Scaffold1_1_654	630366	631016	-	MexL	macrolide antibiotic; tetracycline antibiotic; triclosan
Scaffold1_3_346 # 335887 # 336954 # 1 # ID=3_346;partial=00;start_type=ATG;rbs_motif=GGA/GAG/AGG;rbs_spacer=5-10bp;gc_cont=0.755	Scaffold1_3_346	335887	336954	+	MexS	fluoroquinolone antibiotic; diaminopyrimidine antibiotic; phenicol antibiotic
Scaffold1_1_807 # 788088 # 788984 # 1 # ID=1_807;partial=00;start_type=ATG;rbs_motif=None;rbs_spacer=None;gc_cont=0.769	Scaffold1_1_807	788088	788984	+	MexT	fluoroquinolone antibiotic; diaminopyrimidine antibiotic; phenicol antibiotic
Scaffold1_3_445 # 438880 # 442272 # -1 # ID=3_445;partial=00;start_type=ATG;rbs_motif=3Base/5BMM;rbs_spacer=13-15bp;gc_cont=0.734	Scaffold1_3_445	438880	442272	-	MexW	macrolide antibiotic; fluoroquinolone antibiotic; tetracycline antibiotic; acridine dye; phenicol antibiotic; disinfecting agents and intercalating dyes
Scaffold4_1_15 # 18287 # 20083 # -1 # ID=6_15;partial=00;start_type=ATG;rbs_motif=GGA/GAG/AGG;rbs_spacer=11-12bp;gc_cont=0.715	Scaffold4_1_15	18287	20083	-	msbA	nitroimidazole antibiotic
Scaffold1_1_619 # 597135 # 597821 # 1 # ID=1_619;partial=00;start_type=ATG;rbs_motif=GGAG/GAGG;rbs_spacer=5-10bp;gc_cont=0.672	Scaffold1_1_619	597135	597821	+	mtrA	macrolide antibiotic; penam
Scaffold1_3_446 # 442269 # 443723 # -1 # ID=3_446;partial=00;start_type=ATG;rbs_motif=3Base/5BMM;rbs_spacer=13-15bp;gc_cont=0.786	Scaffold1_3_446	442269	443723	-	mtrC	macrolide antibiotic; penam
Scaffold2_1_266 # 277622 # 278455 # 1 # ID=4_266;partial=00;start_type=ATG;rbs_motif=AGGAG;rbs_spacer=5-10bp;gc_cont=0.667	Scaffold2_1_266	277622	278455	+	Mycobacterium tuberculosis inhA mutations conferring resistance to isoniazid	isoniazid
Scaffold1_3_682 # 666726 # 667376 # -1 # ID=3_682;partial=00;start_type=ATG;rbs_motif=GGAG/GAGG;rbs_spacer=5-10bp;gc_cont=0.734	Scaffold1_3_682	666726	667376	-	nalC	macrolide antibiotic; fluoroquinolone antibiotic; monobactam; carbapenem; cephalosporin; cephamycin; penam; tetracycline antibiotic; peptide antibiotic; aminocoumarin antibiotic; diaminopyrimidine antibiotic; sulfonamide antibiotic; phenicol antibiotic; penem
Scaffold2_1_549 # 566912 # 568696 # -1 # ID=4_549;partial=00;start_type=GTG;rbs_motif=AGxAGG/AGGxGG;rbs_spacer=3-4bp;gc_cont=0.739	Scaffold2_1_549	566912	568696	-	Neisseria gonorrhoeae PBP2 conferring resistance to beta-lactam antibiotics	cephalosporin; cephamycin; penam
Scaffold1_1_681 # 660380 # 661249 # -1 # ID=1_681;partial=00;start_type=ATG;rbs_motif=AGGAG;rbs_spacer=5-10bp;gc_cont=0.763	Scaffold1_1_681	660380	661249	-	NmcR	carbapenem; cephalosporin; cephamycin; penam
Scaffold1_1_734 # 714678 # 716516 # 1 # ID=1_734;partial=00;start_type=ATG;rbs_motif=GGAG/GAGG;rbs_spacer=5-10bp;gc_cont=0.710	Scaffold1_1_734	714678	716516	+	novA	aminocoumarin antibiotic
Scaffold1_2_144 # 156682 # 157428 # -1 # ID=2_144;partial=00;start_type=GTG;rbs_motif=3Base/5BMM;rbs_spacer=13-15bp;gc_cont=0.716	Scaffold1_2_144	156682	157428	-	oleC	macrolide antibiotic
Scaffold1_1_404 # 388202 # 388837 # 1 # ID=1_404;partial=00;start_type=ATG;rbs_motif=GGAG/GAGG;rbs_spacer=5-10bp;gc_cont=0.723	Scaffold1_1_404	388202	388837	+	OmpA	monobactam; carbapenem; cephalosporin; cephamycin; penam; penem
Scaffold3_1_150 # 149160 # 151028 # -1 # ID=5_150;partial=00;start_type=ATG;rbs_motif=None;rbs_spacer=None;gc_cont=0.719	Scaffold3_1_150	149160	151028	-	optrA	macrolide antibiotic; lincosamide antibiotic; streptogramin antibiotic; tetracycline antibiotic; oxazolidinone antibiotic; phenicol antibiotic; pleuromutilin antibiotic
Scaffold1_1_574 # 556692 # 558512 # -1 # ID=1_574;partial=00;start_type=ATG;rbs_motif=GGAG/GAGG;rbs_spacer=5-10bp;gc_cont=0.696	Scaffold1_1_574	556692	558512	-	otr(A)	tetracycline antibiotic
Scaffold1_3_201 # 183570 # 184964 # -1 # ID=3_201;partial=00;start_type=ATG;rbs_motif=None;rbs_spacer=None;gc_cont=0.741	Scaffold1_3_201	183570	184964	-	ParS	macrolide antibiotic; fluoroquinolone antibiotic; monobactam; aminoglycoside antibiotic; carbapenem; cephalosporin; cephamycin; penam; tetracycline antibiotic; acridine dye; phenicol antibiotic; penem; disinfecting agents and intercalating dyes
Scaffold1_3_703 # 685852 # 686730 # -1 # ID=3_703;partial=00;start_type=ATG;rbs_motif=AGGAG;rbs_spacer=5-10bp;gc_cont=0.688	Scaffold1_3_703	685852	686730	-	PEDO-1	carbapenem
Scaffold3_1_157 # 155054 # 156439 # 1 # ID=5_157;partial=00;start_type=ATG;rbs_motif=3Base/5BMM;rbs_spacer=13-15bp;gc_cont=0.732	Scaffold3_1_157	155054	156439	+	PmpM	fluoroquinolone antibiotic; aminoglycoside antibiotic; benzalkonium chloride
Scaffold2_1_760 # 774748 # 775446 # -1 # ID=4_760;partial=00;start_type=ATG;rbs_motif=GGxGG;rbs_spacer=5-10bp;gc_cont=0.765	Scaffold2_1_760	774748	775446	-	Pseudomonas aeruginosa catB7	phenicol antibiotic
Scaffold2_1_526 # 543017 # 543418 # 1 # ID=4_526;partial=00;start_type=TTG;rbs_motif=AGGAG;rbs_spacer=5-10bp;gc_cont=0.697	Scaffold2_1_526	543017	543418	+	Pseudomonas aeruginosa soxR	fluoroquinolone antibiotic; cephalosporin; glycylcycline; penam; tetracycline antibiotic; acridine dye; rifamycin antibiotic; phenicol antibiotic; triclosan; disinfecting agents and intercalating dyes
Scaffold1_1_628 # 603721 # 604914 # 1 # ID=1_628;partial=00;start_type=ATG;rbs_motif=GGA/GAG/AGG;rbs_spacer=5-10bp;gc_cont=0.742	Scaffold1_1_628	603721	604914	+	QepA2	fluoroquinolone antibiotic
Scaffold6_1_19 # 20330 # 21244 # -1 # ID=8_19;partial=00;start_type=ATG;rbs_motif=GGAG/GAGG;rbs_spacer=5-10bp;gc_cont=0.722	Scaffold6_1_19	20330	21244	-	ramA	fluoroquinolone antibiotic; monobactam; carbapenem; cephalosporin; glycylcycline; cephamycin; penam; tetracycline antibiotic; rifamycin antibiotic; phenicol antibiotic; triclosan; penem
Scaffold1_1_240 # 243626 # 244624 # 1 # ID=1_240;partial=00;start_type=ATG;rbs_motif=GGAG/GAGG;rbs_spacer=5-10bp;gc_cont=0.694	Scaffold1_1_240	243626	244624	+	RanA	aminoglycoside antibiotic
Scaffold2_1_476 # 489767 # 491125 # 1 # ID=4_476;partial=00;start_type=ATG;rbs_motif=GGA/GAG/AGG;rbs_spacer=5-10bp;gc_cont=0.784	Scaffold2_1_476	489767	491125	+	rgt1438	rifamycin antibiotic
Scaffold3_1_291 # 281014 # 282912 # -1 # ID=5_291;partial=00;start_type=ATG;rbs_motif=None;rbs_spacer=None;gc_cont=0.728	Scaffold3_1_291	281014	282912	-	rosB	peptide antibiotic
Scaffold2_1_304 # 314850 # 317372 # -1 # ID=4_304;partial=00;start_type=ATG;rbs_motif=GGA/GAG/AGG;rbs_spacer=5-10bp;gc_cont=0.752	Scaffold2_1_304	314850	317372	-	rphA	rifamycin antibiotic
Scaffold2_1_442 # 446585 # 447343 # -1 # ID=4_442;partial=00;start_type=ATG;rbs_motif=3Base/5BMM;rbs_spacer=13-15bp;gc_cont=0.722	Scaffold2_1_442	446585	447343	-	sdiA	fluoroquinolone antibiotic; cephalosporin; glycylcycline; penam; tetracycline antibiotic; rifamycin antibiotic; phenicol antibiotic; triclosan
Scaffold2_1_133 # 133485 # 134372 # 1 # ID=4_133;partial=00;start_type=ATG;rbs_motif=GGAG/GAGG;rbs_spacer=5-10bp;gc_cont=0.765	Scaffold2_1_133	133485	134372	+	SMB-1	carbapenem; cephalosporin; penam
Scaffold2_1_778 # 791176 # 791877 # -1 # ID=4_778;partial=00;start_type=ATG;rbs_motif=AGGA;rbs_spacer=5-10bp;gc_cont=0.664	Scaffold2_1_778	791176	791877	-	smeR	aminoglycoside antibiotic; cephalosporin; cephamycin; penam
Scaffold1_1_346 # 337208 # 337708 # -1 # ID=1_346;partial=00;start_type=ATG;rbs_motif=GGA/GAG/AGG;rbs_spacer=5-10bp;gc_cont=0.760	Scaffold1_1_346	337208	337708	-	sta	nucleoside antibiotic
Scaffold1_1_505 # 490699 # 491406 # -1 # ID=1_505;partial=00;start_type=ATG;rbs_motif=None;rbs_spacer=None;gc_cont=0.782	Scaffold1_1_505	490699	491406	-	sta	nucleoside antibiotic
Scaffold2_1_739 # 748349 # 750469 # -1 # ID=4_739;partial=00;start_type=ATG;rbs_motif=AGGA;rbs_spacer=5-10bp;gc_cont=0.661	Scaffold2_1_739	748349	750469	-	Staphylococcus aureus fusA with mutation conferring resistance to fusidic acid	fusidic acid
Scaffold1_1_303 # 300679 # 301902 # 1 # ID=1_303;partial=00;start_type=ATG;rbs_motif=AGxAGG/AGGxGG;rbs_spacer=3-4bp;gc_cont=0.727	Scaffold1_1_303	300679	301902	+	tet(41)	tetracycline antibiotic
Scaffold3_1_8 # 6503 # 7702 # 1 # ID=5_8;partial=00;start_type=ATG;rbs_motif=AGGAG;rbs_spacer=5-10bp;gc_cont=0.693	Scaffold3_1_8	6503	7702	+	Tet(47)	tetracycline antibiotic
Scaffold1_1_523 # 510697 # 511920 # 1 # ID=1_523;partial=00;start_type=GTG;rbs_motif=None;rbs_spacer=None;gc_cont=0.759	Scaffold1_1_523	510697	511920	+	tet(50)	tetracycline antibiotic
Scaffold2_1_361 # 370985 # 372073 # -1 # ID=4_361;partial=00;start_type=GTG;rbs_motif=None;rbs_spacer=None;gc_cont=0.765	Scaffold2_1_361	370985	372073	-	tet(52)	tetracycline antibiotic
Scaffold1_1_487 # 471305 # 472579 # -1 # ID=1_487;partial=00;start_type=ATG;rbs_motif=GGAGG;rbs_spacer=5-10bp;gc_cont=0.693	Scaffold1_1_487	471305	472579	-	tet(C)	tetracycline antibiotic
Scaffold1_1_430 # 408705 # 410213 # -1 # ID=1_430;partial=00;start_type=GTG;rbs_motif=AGxAGG/AGGxGG;rbs_spacer=3-4bp;gc_cont=0.748	Scaffold1_1_430	408705	410213	-	tetA(58)	tetracycline antibiotic
Scaffold1_1_372 # 356208 # 358007 # -1 # ID=1_372;partial=00;start_type=ATG;rbs_motif=AGxAGG/AGGxGG;rbs_spacer=5-10bp;gc_cont=0.666	Scaffold1_1_372	356208	358007	-	tetB(P)	tetracycline antibiotic
Scaffold1_3_592 # 575068 # 576690 # -1 # ID=3_592;partial=00;start_type=ATG;rbs_motif=None;rbs_spacer=None;gc_cont=0.694	Scaffold1_3_592	575068	576690	-	tetB(P)	tetracycline antibiotic
Scaffold2_1_733 # 743919 # 744791 # -1 # ID=4_733;partial=00;start_type=ATG;rbs_motif=GGAGG;rbs_spacer=5-10bp;gc_cont=0.706	Scaffold2_1_733	743919	744791	-	Thermus thermophilus uL3 mutations conferring resistance to pleuromutilin antibiotics	pleuromutilin antibiotic
Scaffold2_1_322 # 338300 # 339793 # 1 # ID=4_322;partial=00;start_type=ATG;rbs_motif=AGGAGG;rbs_spacer=3-4bp;gc_cont=0.747	Scaffold2_1_322	338300	339793	+	TolC	macrolide antibiotic; fluoroquinolone antibiotic; aminoglycoside antibiotic; carbapenem; cephalosporin; glycylcycline; cephamycin; penam; tetracycline antibiotic; peptide antibiotic; aminocoumarin antibiotic; rifamycin antibiotic; phenicol antibiotic; triclosan; penem
Scaffold1_3_757 # 752789 # 754312 # -1 # ID=3_757;partial=00;start_type=ATG;rbs_motif=GGAG/GAGG;rbs_spacer=5-10bp;gc_cont=0.706	Scaffold1_3_757	752789	754312	-	TriB	triclosan
Scaffold2_1_640 # 664811 # 666550 # 1 # ID=4_640;partial=00;start_type=ATG;rbs_motif=GGA/GAG/AGG;rbs_spacer=5-10bp;gc_cont=0.767	Scaffold2_1_640	664811	666550	+	TriB	triclosan
Scaffold2_1_83 # 80756 # 82108 # 1 # ID=4_83;partial=00;start_type=ATG;rbs_motif=GGAG/GAGG;rbs_spacer=5-10bp;gc_cont=0.712	Scaffold2_1_83	80756	82108	+	TxR	tetracycline antibiotic
Scaffold1_1_726 # 707679 # 709007 # 1 # ID=1_726;partial=00;start_type=ATG;rbs_motif=GGAGG;rbs_spacer=5-10bp;gc_cont=0.727	Scaffold1_1_726	707679	709007	+	ugd	peptide antibiotic
Scaffold1_3_246 # 235414 # 237009 # 1 # ID=3_246;partial=00;start_type=ATG;rbs_motif=AGGAG;rbs_spacer=5-10bp;gc_cont=0.668	Scaffold1_3_246	235414	237009	+	vanHA	glycopeptide antibiotic
Scaffold1_1_307 # 305336 # 305662 # -1 # ID=1_307;partial=00;start_type=ATG;rbs_motif=GGA/GAG/AGG;rbs_spacer=5-10bp;gc_cont=0.685	Scaffold1_1_307	305336	305662	-	YajC	fluoroquinolone antibiotic; cephalosporin; glycylcycline; penam; tetracycline antibiotic; rifamycin antibiotic; phenicol antibiotic; triclosan
